# Supplementary material for: Oral history as a citizen science tool to understand biodiversity loss and environmental changes: on firefly extirpation in Morelia, Michoacán, Mexico
Source: PeerJ. 2025 May 5;13:e19413. doi: 10.7717/peerj.19413 (PMC12060901; doi:10.7717/peerj.19413)
Supplement: Supplemental Information 2 — Answers were synthesized and standardized for this article. [file peerj-13-19413-s002.xlsx]

## Sheet: Sheet1
ID	Generación	Sex	Q1	Q1.1	Q2	Q2.1	Q2.2	Q3	Q3.1	Q4	Q5	Q6	Q7	Q7.1	Q8	Q8.1	Q9	Q9.1	Q10	Q10.1	Q11	Q11.1	Q12	Q12.1	Q12.2	Q13	Q13.1	Q13.2	Q13.3	Q14
P1	Más joven	Mujer	Sí	Por su luz	Sí	Bonito/Bello/Hermoso/Lindo	NA	Sí	Arko San Pedro	Hace 5 años	Solo una vez	Pocas	Sí	Hay menos ahora	Nada ha cambiado	Nada ha cambiado	Sí	Crecimiento urbano	No	No hay buenas condiciones para ellas	No sé	NA	No sé	No sé	NA	No	NA	NA	NA	Sí
P2	Más joven	Mujer	Sí	Por su luz	Sí	Emoción	NA	No	-	Nunca las he visto	NA	NA	NA	NA	NA	NA	No	No he notado cambios	No	No hay buenas condiciones para ellas	Sí	Por sus funciones en el ecosistema	Sí	Valor ambiental	NA	No	NA	NA	NA	Sí
P3	Más joven	Mujer	Sí	Por su luz	Sí	Mágica(o)	NA	No	-	Nunca las he visto	NA	NA	NA	NA	NA	NA	Sí	Crecimiento urbano	No	No hay buenas condiciones para ellas	Sí	Por sus funciones en el ecosistema	Sí	Valor estético	NA	No	NA	NA	NA	Sí
P4	Más joven	Hombre	Sí	Por su luz	Sí	Bonito/Bello/Hermoso/Lindo	NA	No	-	Nunca las he visto	NA	NA	NA	NA	NA	NA	No	No he notado cambios	No	No hay buenas condiciones para ellas	Sí	Por sus funciones en el ecosistema	Sí	Valor ambiental	NA	No	NA	NA	NA	Sí
P5	Más joven	Mujer	Sí	Por su luz	Sí	Sorpresa/asombro/soprendente	NA	No	-	Nunca las he visto	NA	NA	NA	NA	NA	NA	Sí	Crecimiento urbano	No	No hay buenas condiciones para ellas	Sí	Por sus funciones en el ecosistema	Sí	Valor estético	NA	No	NA	NA	NA	Sí
P6	Mediana	Mujer	Sí	Por su luz	Sí	Curiosa/curiosidad	NA	Sí	Lomas de la Huerta	Hace 10 años	Algunas veces	Pocas	Sí	Hay menos ahora	Construcciones	Sí	Sí	Crecimiento urbano	Sí	No hay buenas condiciones para ellas	No sé	NA	No	No son importantes	NA	No	NA	NA	NA	No
P7	Mediana	Hombre	Sí	Por su luz	Sí	Bonito/Bello/Hermoso/Lindo	NA	No	-	Nunca las he visto	NA	NA	NA	NA	NA	NA	Sí	Crecimiento urbano	No lo sé	No lo sé	Sí	Por sus funciones en el ecosistema	Sí	Valor ambiental	NA	No	NA	NA	NA	Sí
P8	Mediana	Mujer	Sí	Por su luz	Sí	Miedo	NA	Sí	Atrás de Bodega	Temporada pasada (2021)	Frecuentemente	Muchas	Sí	Hay menos ahora	Construcciones	Sí	Sí	Crecimiento urbano	No	No hay buenas condiciones para ellas	Sí	Por su función en las redes tróficas	Sí	Valor ambiental	NA	No	NA	NA	NA	Sí
P9	Mediana	Mujer	Sí	Por su luz	Sí	Bonito/Bello/Hermoso/Lindo	NA	No	-	Nunca las he visto	NA	NA	NA	NA	NA	NA	Sí	Crecimiento urbano	Sí	Sí, hay buenas condiciones para ellas	Sí	Por sus funciones en el ecosistema	Sí	Valor emocional	NA	No	NA	NA	NA	Sí
P10	Mediana	Mujer	Sí	Por su luz	Sí	Bonito/Bello/Hermoso/Lindo	NA	Sí	Vergel	Hace 5 años	Solo una vez	Muchas	NA	NA	Construcciones	Sí	Sí	Deforestación	No	No hay buenas condiciones para ellas	No sé	NA	No sé	No sé	NA	No	NA	NA	NA	No
P11	Mediana	Hombre	Sí	Por su luz	Sí	Grata	NA	No	-	Nunca las he visto	NA	NA	NA	NA	NA	NA	Sí	Crecimiento urbano	No	No hay buenas condiciones para ellas	Sí	Por su función en las redes tróficas	Sí	Valor emocional	NA	No	NA	NA	NA	No
P12	Mediana	Mujer	Sí	Por su luz	Sí	Bonito/Bello/Hermoso/Lindo	NA	Sí	Piedra Lisa	Temporada pasada (2021)	Solo pocas veces	Pocas	Sí	Hay menos ahora	Construcciones	Sí	Sí	Crecimiento urbano	Sí	Sí, sería bueno	Sí	Por sus funciones en el ecosistema	Sí	Valor cultural	NA	No	NA	NA	NA	Sí
P13	Mediana	Hombre	Sí	Por su luz	Sí	Miedo	NA	Sí	Fracc. Heroes Republicanos	Temporada pasada (2021)	Solo pocas veces	Muchas	Sí	Ahora hay más	Construcciones	Sí	Sí	Crecimiento urbano	Sí	Sí, sería bueno	Sí	Por sus funciones en el ecosistema	Sí	Valor estético	NA	No	NA	NA	NA	Sí
P14	Mediana	Hombre	Sí	Por su luz	Sí	Bonito/Bello/Hermoso/Lindo	NA	Sí	Metrópolis 2	Temporada pasada (2021)	Frecuentemente	Muchas	No	Nada ha cambiado	Cultivos	Sí	Sí	Crecimiento urbano	No	No hay buenas condiciones para ellas	Sí	Por sus funciones en el ecosistema	Sí	Valor estético	NA	No	NA	NA	NA	No
P15	Mediana	Hombre	Sí	Por su luz	Sí	Bonito/Bello/Hermoso/Lindo	NA	Sí	Metrópolis 3	Temporada pasada (2021)	Frecuentemente	Muchas	No	Nada ha cambiado	Cultivos	Sí	Sí	Crecimiento urbano	No	No hay buenas condiciones para ellas	Sí	Por sus funciones en el ecosistema	Sí	Valor estético	NA	No	NA	NA	NA	No
P16	Mediana	Hombre	Sí	Por su luz	Sí	Bonito/Bello/Hermoso/Lindo	NA	Sí	Cointzio	Temporada pasada (2021)	Frecuentemente	Muchas	No	Nada ha cambiado	Nada ha cambiado	Nada ha cambiado	Sí	Crecimiento urbano	No	No hay buenas condiciones para ellas	Sí	Por sus funciones en el ecosistema	No	No son importantes	NA	No	NA	NA	NA	No
P17	Más vieja	Mujer	Sí	Por su luz	Sí	Bonito/Bello/Hermoso/Lindo	NA	No	-	Nunca las he visto	NA	NA	NA	NA	NA	NA	Sí	Crecimiento urbano	Sí	Sí, hay buenas condiciones para ellas	Sí	Por sus funciones en el ecosistema	Sí	Valor ambiental	NA	No	NA	NA	NA	Sí
P18	Más vieja	Mujer	Sí	Por su luz	Sí	Bonito/Bello/Hermoso/Lindo	NA	No	-	Nunca las he visto	NA	NA	NA	NA	NA	NA	Sí	Crecimiento urbano	No lo sé	No lo sé	No sé	NA	Sí	Valor estético	NA	No	NA	NA	NA	Sí
P19	Más vieja	Mujer	Sí	Por su luz	Sí	Bonito/Bello/Hermoso/Lindo	NA	Sí	Estadio morelos	Temporada pasada (2021)	Solo pocas veces	Muchas	Sí	Hay menos ahora	Todas las anteriores	Sí	Sí	Contaminación	No	No hay buenas condiciones para ellas	Sí	Por su valor intrínseco	Sí	Valor ambiental	NA	No	NA	NA	NA	Sí
P20	Más vieja	Mujer	Sí	Por su luz	Sí	Satisfactoria	NA	Sí	Monumento Lázaro Cárdenas	Hace 50 años o más	Solo pocas veces	Muchas	No	Nada ha cambiado	Todas las anteriores	Sí	Sí	Contaminación	No	No hay buenas condiciones para ellas	Sí	Por su valor intrínseco	Sí	Valor estético	NA	No	NA	NA	NA	Sí
P21	Más vieja	Mujer	Sí	Por su luz	Sí	Sorpresa/asombro/soprendente	NA	Sí	Zirahuen	Hace 5 años	Nunca las volví a ver	Algunas	Sí	Hay menos ahora	Construcciones	Sí	Sí	Crecimiento urbano	Sí	Sí, sería bueno	Sí	Por sus funciones en el ecosistema	Sí	Valor estético	NA	No	NA	NA	NA	No
P22	Más vieja	Hombre	Sí	Por su luz	Sí	Bonito/Bello/Hermoso/Lindo	NA	Sí	Colonia Independencia	Hace 50 años o más	Nunca las volví a ver	Algunas	Sí	Hay menos ahora	Construcciones	Sí	Sí	Crecimiento urbano	Sí	Sí, sería bueno	Sí	Por su valor intrínseco	No sé	No sé	NA	No	NA	NA	NA	Sí
P23	Más joven	Mujer	Sí	Por su luz	Sí	Bonito/Bello/Hermoso/Lindo	NA	Sí	Quinceo	Temporada pasada (2021)	Solo una vez	Pocas	NA	NA	Nada ha cambiado	Nada ha cambiado	No	No he notado cambios	NA	NA	No sé	NA	Sí	Valor estético	NA	No	NA	NA	NA	No
P24	Más joven	Mujer	Sí	Por su luz	Sí	Emoción	NA	No	-	Nunca las he visto	NA	NA	NA	NA	NA	NA	No	No he notado cambios	No lo sé	No lo sé	Sí	Por sus funciones en el ecosistema	No sé	No sé	NA	No	NA	NA	NA	No
P25	Más joven	Hombre	Sí	Por su luz	Otros medios	NA	Sí	NA	-	NA	NA	NA	NA	NA	NA	NA	Sí	Crecimiento urbano	No	No hay buenas condiciones para ellas	No sé	NA	Sí	Valor estético	NA	NA	NA	NA	NA	Sí
P26	Más joven	Mujer	Sí	Por su luz	Sí	Bonito/Bello/Hermoso/Lindo	NA	No	-	Nunca las he visto	NA	NA	NA	NA	NA	NA	Sí	Crecimiento urbano	No	No hay buenas condiciones para ellas	No sé	NA	Sí	Valor estético	NA	No	NA	NA	NA	No
P27	Más joven	Hombre	Sí	Por su luz	Sí	Divertida	NA	Sí	Quinceo	Temporada pasada (2021)	Solo una vez	Pocas	NA	NA	Nada ha cambiado	Nada ha cambiado	No	No he notado cambios	NA	NA	Sí	Por sus funciones en el ecosistema	Sí	Valor emocional	NA	Sí	Que antes veían muchas luciérnagas ahí	Abuelos	Hace más de 20 años	No
P28	Más joven	Hombre	Sí	Por su luz	Sí	Agradable/lo disfrutaba/me gustó	NA	Sí	Campo Nubes	Temporada pasada (2021)	Frecuentemente	Pocas	Sí	Desaparecieron	Todas las anteriores	Sí	Sí	Contaminación	Sí	Sí, sería bueno	Sí	Por sus funciones en el ecosistema	Sí	Valor estético	NA	No	NA	NA	NA	Sí
P29	Más joven	Hombre	No	NA	No reconoce el término luciérnaga	NA	NA	NA	-	NA	NA	NA	NA	NA	NA	NA	No	No he notado cambios	NA	NA	NA	NA	NA	NA	NA	No	NA	NA	NA	No respondió la pregunta
P30	Más joven	Mujer	Sí	Por su luz	Sí	Bonito/Bello/Hermoso/Lindo	NA	Sí	La Planta	Temporada pasada (2021)	Algunas veces	Algunas	Sí	Ahora hay más	Construcciones	Sí	No	No he notado cambios	No	No hay buenas condiciones para ellas	Sí	Por su valor intrínseco	Sí	Valor emocional	NA	No	NA	NA	NA	Sí
P31	Más joven	Hombre	Sí	Por su luz	Sí	Emoción	NA	Sí	Emiliano Zapata	Temporada pasada (2021)	Frecuentemente	Pocas	Sí	Hay menos ahora	Nada ha cambiado	Nada ha cambiado	No	No he notado cambios	NA	NA	Sí	Por su valor intrínseco	Sí	Valor estético	NA	Sí	Que habían más luciérnagas	Abuela	Hace casi 5 años	No
P32	Más joven	Hombre	Sí	Por su luz	Sí	Bonito/Bello/Hermoso/Lindo	NA	Sí	Villas del pedregal	Hace 5 años	Algunas veces	Pocas	Sí	Hay menos ahora	Iluminación artificial	Sí	Sí	Crecimiento urbano	NA	NA	No sé	NA	Sí	Valor estético	NA	Sí	Que en los pueblos y grangas se veían mucho en la noche	Abuelos	Hace más de 20 años	No
P33	Más joven	Mujer	Sí	Por su luz	Sí	Bonito/Bello/Hermoso/Lindo	NA	Sí	La Aldea	Temporada pasada (2021)	Frecuentemente	Muchas	Sí	Hay menos ahora	Nada ha cambiado	Nada ha cambiado	No	No he notado cambios	NA	NA	Sí	Por sus funciones en el ecosistema	Sí	Valor emocional	NA	No	NA	NA	NA	Sí
P34	Más joven	Hombre	Sí	Por su luz	Otros medios	NA	Sí	NA	-	NA	NA	NA	NA	NA	NA	NA	Sí	Crecimiento urbano	No	No hay buenas condiciones para ellas	Sí	Por su función en las redes tróficas	Sí	Valor ambiental	NA	No	NA	NA	NA	No respondió la pregunta
P35	Más joven	Hombre	Sí	Por su luz	Sí	Bonito/Bello/Hermoso/Lindo	NA	Sí	Mil Cumbres	Temporada pasada (2021)	Solo pocas veces	Pocas	Sí	Hay menos ahora	Nada ha cambiado	Nada ha cambiado	Sí	Crecimiento urbano	No	No hay buenas condiciones para ellas	Sí	Por sus funciones en el ecosistema	Sí	Valor estético	NA	NA	NA	NA	NA	Sí
P36	Más joven	Hombre	Sí	Por su luz	Sí	Bonito/Bello/Hermoso/Lindo	NA	Sí	Mil Cumbres	Temporada pasada (2021)	Solo una vez	Pocas	NA	NA	Nada ha cambiado	Nada ha cambiado	Sí	Crecimiento urbano	No	No hay buenas condiciones para ellas	Sí	Por sus funciones en el ecosistema	Sí	Valor estético	NA	NA	NA	NA	NA	Sí
P37	Más joven	Hombre	Sí	Por su luz	Sí	Sorpresa/asombro/soprendente	NA	Sí	En el Planetario	Temporada pasada (2021)	Solo una vez	Pocas	NA	NA	Nada ha cambiado	Nada ha cambiado	Sí	Deforestación	No	No hay buenas condiciones para ellas	Sí	Por sus funciones en el ecosistema	Sí	Valor estético	NA	No	NA	NA	NA	No
P38	Más joven	Mujer	Sí	Por su luz	Otros medios	NA	Sí	NA	-	NA	NA	NA	NA	NA	NA	NA	Sí	Crecimiento urbano	No lo sé	No lo sé	No sé	NA	Sí	Valor estético	NA	No	NA	NA	NA	No respondió la pregunta
P39	Más joven	Hombre	Sí	Por su luz	Otros medios	NA	Sí	NA	-	NA	NA	NA	NA	NA	NA	NA	Sí	Crecimiento urbano	No lo sé	No lo sé	Sí	Por sus funciones en el ecosistema	Sí	Valor ambiental	NA	No	NA	NA	NA	No respondió la pregunta
P40	Más joven	Mujer	Sí	Por su luz	Sí	Mágica(o)	NA	Sí	Valle Real	Temporada pasada (2021)	Frecuentemente	Pocas	Sí	Hay menos ahora	Construcciones	Sí	Sí	Crecimiento urbano	NA	NA	Sí	Por sus funciones en el ecosistema	Sí	Valor estético	NA	No	NA	NA	NA	Sí
P41	Más joven	Hombre	Sí	Por su luz	Sí	Bonito/Bello/Hermoso/Lindo	NA	Sí	En la salida a Charo	Hace 5 años	Solo una vez	Muchas	NA	NA	Otros	Sí	Sí	Crecimiento urbano	No	No hay buenas condiciones para ellas	Sí	Por sus funciones en el ecosistema	Sí	Valor emocional	NA	No	NA	NA	NA	Sí
P42	Más joven	Mujer	Sí	Por su luz	Sí	Bonito/Bello/Hermoso/Lindo	NA	Sí	Cointzio	Hace 5 años	Solo pocas veces	Pocas	Sí	Hay menos ahora	Construcciones	Sí	No	No he notado cambios	NA	NA	Sí	Por sus funciones en el ecosistema	Sí	Valor emocional	NA	Sí	Que tenían una sustancia que quemaba	Mamá	Hace casi 10 años	No
P43	Más joven	Hombre	Sí	Por su luz	Sí	Agradable/lo disfrutaba/me gustó	NA	Sí	Nueva Esperanza	Hace 5 años	Solo pocas veces	Pocas	Sí	Hay menos ahora	Iluminación artificial	Sí	Sí	Crecimiento urbano	NA	NA	Sí	Por sus funciones en el ecosistema	Sí	Valor emocional	NA	Sí	Que antes veían muchas lucierngas	Padres	Hace más de 20 años	No
P44	Más joven	Mujer	Sí	Por su luz	Sí	Agradable/lo disfrutaba/me gustó	NA	Sí	Atécuaro	Hace 10 años	Nunca las volví a ver	Pocas	NA	NA	Deforestación	Sí	Sí	Crecimiento urbano	Sí	Sí, hay buenas condiciones para ellas	Sí	Por sus funciones en el ecosistema	Sí	Valor estético	NA	Sí	Que solían ver muchas luciérnagas en Atécuaro	Abuelos	Hace más de 50 años	No
P45	Más joven	Mujer	Sí	Por su luz	Sí	Bonito/Bello/Hermoso/Lindo	NA	No	-	Nunca las he visto	NA	NA	NA	NA	NA	NA	Sí	Crecimiento urbano	Sí	Sí, sería bueno	No sé	NA	Sí	Valor estético	NA	No	NA	NA	NA	No
P46	Más joven	Mujer	Sí	Por su luz	Sí	Bonito/Bello/Hermoso/Lindo	NA	No	-	Nunca las he visto	NA	NA	NA	NA	NA	NA	Sí	Crecimiento urbano	No	No hay buenas condiciones para ellas	Sí	Por sus funciones en el ecosistema	Sí	Valor estético	NA	No	NA	NA	NA	No
P47	Más joven	Mujer	No	NA	No reconoce el término luciérnaga	NA	NA	NA	-	NA	NA	NA	NA	NA	NA	NA	No	No he notado cambios	NA	NA	NA	NA	NA	NA	NA	No	NA	NA	NA	No respondió la pregunta
P48	Más joven	Mujer	Sí	Por su luz	Sí	Bonito/Bello/Hermoso/Lindo	NA	Sí	Unidad Satélite	Hace 5 años	Nunca las volví a ver	Pocas	Sí	Desaparecieron	Construcciones	Sí	Sí	Crecimiento urbano	NA	NA	Sí	Por sus funciones en el ecosistema	Sí	Valor emocional	NA	No	NA	NA	NA	Sí
P49	Más joven	Mujer	Sí	Por su luz	Otros medios	NA	Sí	NA	-	NA	NA	NA	NA	NA	NA	NA	Sí	Crecimiento urbano	Sí	Sí, hay buenas condiciones para ellas	Sí	Por sus funciones en el ecosistema	Sí	Valor estético	NA	No	NA	NA	NA	No respondió la pregunta
P50	Más joven	Hombre	Sí	Por su luz	Sí	Maravillosa	NA	Sí	Buenos Aires, La Aldea, Villas de Oriente	Hace 5 años	Solo pocas veces	Algunas	No	Nada ha cambiado	Pérdida de bosques	Sí	Sí	Crecimiento urbano	Sí	Sí, sería bueno	Sí	Por su función en las redes tróficas	Sí	Valor ambiental	NA	No	NA	NA	NA	Sí
P51	Más joven	Mujer	Sí	Por su luz	Otros medios	NA	Sí	NA	-	NA	NA	NA	NA	NA	NA	NA	Sí	Crecimiento urbano	Sí	Sí, sería bueno	Sí	Por sus funciones en el ecosistema	Sí	Valor estético	NA	No	NA	NA	NA	Sí
P52	Más joven	Hombre	Sí	Por su luz	Sí	Bonito/Bello/Hermoso/Lindo	NA	No	-	Nunca las he visto	NA	NA	NA	NA	NA	NA	Sí	Crecimiento urbano	Sí	Sí, hay buenas condiciones para ellas	Sí	Por sus funciones en el ecosistema	Sí	Valor ambiental	NA	No	NA	NA	NA	No
P53	Mediana	Mujer	Sí	Por su luz	Sí	Emoción	NA	Sí	Francisco Villa	Hace 15 años	Nunca las volví a ver	Muchas	Sí	Desaparecieron	Construcciones	Sí	Sí	Crecimiento urbano	No	No hay buenas condiciones para ellas	Sí	Por sus funciones en el ecosistema	Sí	Valor emocional	NA	No	NA	NA	NA	No
P54	Mediana	Hombre	Sí	Por su luz	Otros medios	NA	No	NA	-	NA	NA	NA	NA	NA	NA	NA	Sí	Crecimiento urbano	Sí	Sí, sería bueno	Sí	Por sus funciones en el ecosistema	No	No son importantes	No he tenido un acercamiento con ellas	Sí	Que en su infancia las veía mucho	Papá	Hace más de 20 años	No respondió la pregunta
P55	Mediana	Hombre	Sí	Por su luz	Otros medios	NA	Sí	NA	-	NA	NA	NA	NA	NA	NA	NA	Sí	Caminos y carreteras	No	No hay buenas condiciones para ellas	No sé	NA	No sé	No sé	NA	No	NA	NA	NA	No respondió la pregunta
P56	Mediana	Hombre	Sí	Por su luz	Sí	Agradable/lo disfrutaba/me gustó	NA	Sí	Bosque Cuahutémoc, Lazaro Cardenas, Punhuato	Temporada pasada (2021)	Solo una vez	Pocas	No	Nada ha cambiado	Construcciones	Sí	Sí	Crecimiento urbano	No	No hay buenas condiciones para ellas	Sí	Por sus funciones en el ecosistema	Sí	Valor estético	NA	No	NA	NA	NA	Sí
P57	Mediana	Mujer	Sí	Por su luz	Sí	Emoción	NA	Sí	Metrópolis	Temporada pasada (2021)	Solo una vez	Pocas	NA	NA	Nada ha cambiado	Nada ha cambiado	Sí	Cambio climático	Sí	Sí, sería bueno	Sí	Por sus funciones en el ecosistema	Sí	Valor estético	NA	No	NA	NA	NA	Sí
P58	Mediana	Mujer	Sí	Por su luz	Sí	Emoción	NA	No	-	Nunca las he visto	NA	NA	NA	NA	NA	NA	Sí	Crecimiento urbano	Sí	Sí, hay buenas condiciones para ellas	No sé	NA	Sí	Valor emocional	NA	Sí	Que antes era puro bosque y había muchas luciérnagas	Abuela, mamá	Hace más de 20 años	No respondió la pregunta
P59	Mediana	Hombre	Sí	Por su luz	Sí	Emoción	NA	Sí	Parian	Hace 5 años	Solo pocas veces	Pocas	Sí	Hay menos ahora	Construcciones	Sí	Sí	Crecimiento urbano	No	No hay buenas condiciones para ellas	No sé	NA	Sí	Valor estético	NA	Sí	Que ya iba a empazar a llover porque empezaban a salir las luciérnagas	NA	Hace más de 20 años	Sí
P60	Mediana	Mujer	Sí	Por su luz	Otros medios	NA	Sí	NA	-	NA	NA	NA	NA	NA	NA	NA	Sí	Cambio climático	No	No hay buenas condiciones para ellas	Sí	Por sus funciones en el ecosistema	Sí	Valor estético	NA	No	NA	NA	NA	No respondió la pregunta
P61	Mediana	Mujer	Sí	Por su luz	Sí	Miedo	NA	Sí	20 de Noviembre	Temporada pasada (2021)	Solo una vez	Pocas	NA	NA	Construcciones	Sí	Sí	Crecimiento urbano	NA	NA	Sí	Por su función en las redes tróficas	Sí	Valor ambiental	NA	No	NA	NA	NA	Sí
P62	Mediana	Mujer	Sí	Por su luz	Sí	Bonito/Bello/Hermoso/Lindo	NA	Sí	Santa Maria, Atrás de Costco	Temporada pasada (2021)	Frecuentemente	Muchas	Sí	Desaparecieron	Construcciones	Sí	Sí	Crecimiento urbano	No	No hay buenas condiciones para ellas	Sí	Como bioindicadores	Sí	Valor cultural	NA	Sí	Que se relacionan con sitios con bastante humedad y lluvia	Padres	Hace más de 20 años	Sí
P63	Mediana	Mujer	Sí	Por su luz	Sí	Bonito/Bello/Hermoso/Lindo	NA	No	-	Nunca las he visto	NA	NA	NA	NA	NA	NA	Sí	Crecimiento urbano	No	No hay buenas condiciones para ellas	Sí	Por sus funciones en el ecosistema	Sí	Valor emocional	NA	Sí	Que antes de las construcciones en la parte sur de Morelia se veáan muchísimas	Mamá	Hace más de 20 años	Sí
P64	Mediana	Mujer	Sí	Por su luz	Sí	Sorpresa/asombro/soprendente	NA	Sí	Arrollo Colorado y Fresnos	Temporada pasada (2021)	Solo pocas veces	Muchas	Sí	Hay menos ahora	Nada ha cambiado	Nada ha cambiado	Sí	Crecimiento urbano	No	No hay buenas condiciones para ellas	Sí	Como bioindicadores	Sí	Valor ambiental	NA	No	NA	NA	NA	Sí
P65	Mediana	Mujer	Sí	Por su luz	Otros medios	NA	Sí	NA	-	NA	NA	NA	NA	NA	NA	NA	Sí	Crecimiento urbano	No	No hay buenas condiciones para ellas	Sí	Por su función en las redes tróficas	Sí	Valor estético	NA	No	NA	NA	NA	No respondió la pregunta
P66	Mediana	Mujer	Sí	Por su luz	Sí	Emoción	NA	Sí	Emiliano Zapata	Temporada pasada (2021)	Solo pocas veces	Pocas	Sí	Hay menos ahora	Construcciones	Sí	Sí	Crecimiento urbano	NA	NA	Sí	Por su función en las redes tróficas	Sí	Valor emocional	NA	No	NA	NA	NA	Sí
P67	Mediana	Hombre	Sí	Por su luz	Sí	Curiosa/curiosidad	NA	Sí	Fraccionamiento Vergel, Emiliano Zapata	Temporada pasada (2021)	Solo pocas veces	Pocas	Sí	Hay menos ahora	Construcciones	Sí	Sí	Crecimiento urbano	NA	NA	Sí	Por sus funciones en el ecosistema	Sí	Valor emocional	NA	Sí	Como jugaban con ellas	Hermanos	Hace más de 20 años	No
P68	Mediana	Mujer	Sí	Por su luz	Sí	Agradable/lo disfrutaba/me gustó	NA	Sí	Atrás de Pepsi	Hace aprox 20-49 años	Nunca las volví a ver	Algunas	Sí	Desaparecieron	Construcciones	Sí	Sí	Crecimiento urbano	No	No hay buenas condiciones para ellas	Sí	Por sus funciones en el ecosistema	Sí	Valor emocional	NA	Sí	Que en su rancho había muchas	Papá	Hace más de 50 años	Sí
P69	Mediana	Mujer	Sí	Por su luz	Sí	Fascinación	NA	Sí	Colonia Soledad	Temporada pasada (2021)	Frecuentemente	Pocas	Sí	Hay menos ahora	Nada ha cambiado	Nada ha cambiado	Sí	Crecimiento urbano	Sí	Sí, hay buenas condiciones para ellas	Sí	Por sus funciones en el ecosistema	Sí	Valor estético	NA	No	NA	NA	NA	Sí
P70	Mediana	Mujer	Sí	Por su luz	Sí	Curiosa/curiosidad	NA	Sí	Panteón Municipal	Hace 15 años	Nunca las volví a ver	Pocas	Sí	Desaparecieron	Construcciones	Sí	Sí	Crecimiento urbano	No	No hay buenas condiciones para ellas	Sí	Por su función en las redes tróficas	Sí	Valor emocional	NA	No	NA	NA	NA	Sí
P71	Mediana	Mujer	Sí	Por su luz	Sí	Bonito/Bello/Hermoso/Lindo	NA	No	-	Nunca las he visto	NA	NA	NA	NA	NA	NA	Sí	Crecimiento urbano	No	No hay buenas condiciones para ellas	Sí	Por sus funciones en el ecosistema	Sí	Valor ambiental	NA	No	NA	NA	NA	Sí
P72	Mediana	Mujer	Sí	Por su luz	Sí	Divertida	NA	Sí	Tres Puentes	Hace 5 años	Solo pocas veces	Pocas	Sí	Hay menos ahora	Construcciones	Sí	Sí	Crecimiento urbano	Sí	Sí, hay buenas condiciones para ellas	Sí	Por sus funciones en el ecosistema	Sí	Valor emocional	NA	Sí	Que se aparecían en la noche	Abuela	Hace más de 20 años	No
P73	Mediana	Mujer	Sí	Por su luz	Sí	Bonito/Bello/Hermoso/Lindo	NA	Sí	Panteón Municipal, Internado España Mexico	Temporada pasada (2021)	Solo pocas veces	Pocas	Sí	Hay menos ahora	Nada ha cambiado	Nada ha cambiado	Sí	Crecimiento urbano	Sí	Sí, sería bueno	Sí	Por sus funciones en el ecosistema	Sí	Valor cultural	NA	No	NA	NA	NA	Sí
P74	Mediana	Mujer	Sí	Por su luz	Sí	Bonito/Bello/Hermoso/Lindo	NA	No	-	Nunca las he visto	NA	NA	NA	NA	NA	NA	Sí	Crecimiento urbano	Sí	Sí, hay buenas condiciones para ellas	Sí	Por sus funciones en el ecosistema	Sí	Valor emocional	NA	No	NA	NA	NA	Sí
P75	Mediana	Mujer	Sí	Por su luz	Sí	Agradable/lo disfrutaba/me gustó	NA	Sí	Salida de Quiroga	Temporada pasada (2021)	Solo una vez	Muchas	NA	NA	Nada ha cambiado	Nada ha cambiado	Sí	Crecimiento urbano	Sí	No hay buenas condiciones para ellas	Sí	Por sus funciones en el ecosistema	No	No son importantes	No me generaban interés (Pasaban desapercibidas)	Sí	Que hace unos años todavía se lograba ver	Vecinos	Hace casi 5 años	Sí
P76	Mediana	Hombre	Sí	Por su luz	Sí	Bonito/Bello/Hermoso/Lindo	NA	Sí	Rumbo a la UNAM	Hace aprox 20-49 años	Nunca las volví a ver	Pocas	Sí	Desaparecieron	Construcciones	Sí	Sí	Crecimiento urbano	No	No hay buenas condiciones para ellas	Sí	Por su función en las redes tróficas	Sí	Valor estético	NA	Sí	Que eran muy bonitas	Padres	Hace más de 20 años	Sí
P77	Mediana	Mujer	Sí	Por su luz	Sí	Curiosa/curiosidad	NA	Sí	ENES	Temporada pasada (2021)	Solo pocas veces	Pocas	No sé	No sé	Construcciones	Sí	Sí	Crecimiento urbano	No lo sé	No lo sé	No sé	NA	No	No son importantes	No me generaban interés (No me parecen importantes)	No	NA	NA	NA	No
P78	Mediana	Mujer	Sí	Por su luz	Sí	Agradable/lo disfrutaba/me gustó	NA	Sí	20 de Noviembre	Hace aprox 20-49 años	Solo pocas veces	Pocas	Sí	Hay menos ahora	Construcciones	Sí	Sí	Crecimiento urbano	NA	NA	Sí	Por su función en las redes tróficas	Sí	Valor emocional	NA	No	NA	NA	NA	Sí
P79	Mediana	Hombre	Sí	Por su luz	Sí	Bonito/Bello/Hermoso/Lindo	NA	Sí	Bosque Cuahutémoc	Temporada pasada (2021)	Solo pocas veces	Pocas	No sé	No sé	Nada ha cambiado	Nada ha cambiado	Sí	Crecimiento urbano	No	No hay buenas condiciones para ellas	Sí	Por su función en las redes tróficas	Sí	Valor ambiental	NA	No	NA	NA	NA	Sí
P80	Mediana	Mujer	No	NA	No reconoce el término luciérnaga	NA	NA	NA	-	NA	NA	NA	NA	NA	NA	NA	Sí	Crecimiento urbano	NA	NA	NA	NA	NA	NA	NA	No	NA	NA	NA	No respondió la pregunta
P81	Mediana	Hombre	Sí	Por su luz	Sí	Agradable/lo disfrutaba/me gustó	NA	Sí	Bosque Cuahutémoc	Hace aprox 20-49 años	Nunca las volví a ver	Muchas	Sí	Desaparecieron	Construcciones	Sí	Sí	Crecimiento urbano	No	No hay buenas condiciones para ellas	Sí	Por sus funciones en el ecosistema	Sí	Valor emocional	NA	No	NA	NA	NA	Sí
P82	Mediana	Mujer	Sí	Por su luz	Sí	Bonito/Bello/Hermoso/Lindo	NA	No	-	Nunca las he visto	NA	NA	NA	NA	NA	NA	Sí	Crecimiento urbano	No	No hay buenas condiciones para ellas	Sí	Por sus funciones en el ecosistema	Sí	Valor cultural	NA	No	NA	NA	NA	No
P83	Más vieja	Hombre	Sí	Por su luz	Sí	Curiosa/curiosidad	NA	Sí	Bosque Cuahutémoc	Temporada pasada (2021)	Algunas veces	Muchas	Sí	Hay menos ahora	Deforestación	Sí	Sí	Crecimiento urbano	No	No hay buenas condiciones para ellas	Sí	Por sus funciones en el ecosistema	Sí	Valor cultural	NA	No	NA	NA	NA	Sí
P84	Más vieja	Mujer	Sí	Por su luz	Sí	Bonito/Bello/Hermoso/Lindo	NA	Sí	Prados Verdes	Temporada pasada (2021)	Frecuentemente	Algunas	Sí	Hay menos ahora	Nada ha cambiado	Nada ha cambiado	No	No he notado cambios	NA	NA	No sé	NA	Sí	Valor estético	NA	No	NA	NA	NA	Sí
P85	Más vieja	Mujer	Sí	Por su luz	Sí	Bonito/Bello/Hermoso/Lindo	NA	Sí	Felícitas del Rio	Temporada pasada (2021)	Frecuentemente	Pocas	Sí	Hay menos ahora	Construcciones	Sí	Sí	Crecimiento urbano	NA	NA	Sí	Por sus funciones en el ecosistema	Sí	Valor estético	NA	No	NA	NA	NA	No
P86	Más vieja	Mujer	Sí	Por su luz	Sí	Bonito/Bello/Hermoso/Lindo	NA	Sí	Colonia Industrial, Las Margaritas	Temporada pasada (2021)	Solo pocas veces	Pocas	Sí	Hay menos ahora	Construcciones	Sí	Sí	Crecimiento urbano	NA	NA	No sé	NA	Sí	Valor emocional	NA	No	NA	NA	NA	Sí
P87	Más vieja	Mujer	Sí	Por su luz	Sí	Bonito/Bello/Hermoso/Lindo	NA	No	-	Nunca las he visto	NA	NA	NA	NA	NA	NA	Sí	Crecimiento urbano	No	No hay buenas condiciones para ellas	Sí	Por sus funciones en el ecosistema	Sí	Valor estético	NA	No	NA	NA	NA	Sí
P88	Más vieja	Mujer	Sí	Por su luz	Sí	Bonito/Bello/Hermoso/Lindo	NA	Sí	Jardin Botánico	Hace 5 años	Solo pocas veces	Algunas	No	Nada ha cambiado	Construcciones	Sí	Sí	Crecimiento urbano	No	No hay buenas condiciones para ellas	No sé	NA	Sí	Valor estético	NA	No	NA	NA	NA	No
P89	Más vieja	Mujer	Sí	Por su luz	Sí	Bonito/Bello/Hermoso/Lindo	NA	Sí	La Quemada y Villas	Hace 10 años	Nunca las volví a ver	Pocas	Sí	Hay menos ahora	Construcciones	Sí	Sí	Crecimiento urbano	NA	NA	No sé	NA	Sí	Valor estético	NA	No	NA	NA	NA	Sí
P90	Más vieja	Hombre	Sí	Por su luz	Sí	Sorpresa/asombro/soprendente	NA	Sí	Lomas de Guayangareo	Temporada pasada (2021)	Solo pocas veces	Algunas	Sí	Desaparecieron	Construcciones	Sí	Sí	Crecimiento urbano	No	No hay buenas condiciones para ellas	Sí	Por sus funciones en el ecosistema	Sí	Valor emocional	NA	No	NA	NA	NA	Sí
P91	Más vieja	Hombre	Sí	Por su luz	Sí	Curiosa/curiosidad	NA	Sí	Santiaguito	Hace 15 años	Nunca las volví a ver	Pocas	Sí	Desaparecieron	Construcciones	Sí	Sí	Crecimiento urbano	No	No hay buenas condiciones para ellas	Sí	Por sus funciones en el ecosistema	Sí	Valor estético	NA	No	NA	NA	NA	Sí
P92	Más vieja	Hombre	Sí	Por su luz	Sí	Bonito/Bello/Hermoso/Lindo	NA	Sí	Rafael Carrillo	Hace 50 años o más	Nunca las volví a ver	Pocas	Sí	Desaparecieron	Construcciones	Sí	Sí	Crecimiento urbano	No	No hay buenas condiciones para ellas	No sé	NA	Sí	Valor emocional	NA	No	NA	NA	NA	No
P93	Más vieja	Mujer	Sí	Por su luz	Sí	Bonito/Bello/Hermoso/Lindo	NA	Sí	San Pascual	Hace aprox 20-49 años	Nunca las volví a ver	Muchas	Sí	Desaparecieron	Construcciones	Sí	Sí	Deforestación	No	No hay buenas condiciones para ellas	No sé	NA	Sí	Valor estético	NA	No	NA	NA	NA	Sí
P94	Más vieja	Hombre	Sí	Por su luz	Sí	Sorpresa/asombro/soprendente	NA	Sí	Salida Quiroga	Hace 5 años	Nunca las volví a ver	Muchas	Sí	Desaparecieron	Construcciones	Sí	Sí	Crecimiento urbano	Sí	Sí, hay buenas condiciones para ellas	No sé	NA	Sí	Valor estético	NA	No	NA	NA	NA	Sí
P95	Más vieja	Mujer	Sí	Por su luz	Sí	Bonito/Bello/Hermoso/Lindo	NA	No	-	Nunca las he visto	NA	NA	NA	NA	NA	NA	Sí	Deforestación	Sí	Sí, hay buenas condiciones para ellas	No sé	NA	Sí	Valor estético	NA	No	NA	NA	NA	Sí
P96	Más vieja	Hombre	Sí	Por su luz	Sí	Bonito/Bello/Hermoso/Lindo	NA	Sí	Policia y Tránsito, Emiliano Zapata, Quinceo	Hace aprox 20-49 años	Nunca las volví a ver	Muchas	Sí	Hay menos ahora	Construcciones	Sí	Sí	Crecimiento urbano	No	No hay buenas condiciones para ellas	Sí	Por sus funciones en el ecosistema	Sí	Valor estético	NA	Sí	Que había alumbradores	Abuelo, papá	Hace más de 50 años	Sí
P97	Más vieja	Hombre	Sí	Por su luz	Sí	Agradable/lo disfrutaba/me gustó	NA	No	-	Nunca las he visto	NA	NA	NA	NA	NA	NA	Sí	Crecimiento urbano	Sí	Sí, hay buenas condiciones para ellas	Sí	Por sus funciones en el ecosistema	Sí	Valor ambiental	NA	No	NA	NA	NA	Sí
P98	Más vieja	Hombre	Sí	Por su luz	Sí	Bonito/Bello/Hermoso/Lindo	NA	Sí	Felícitas del Río	Hace 5 años	Nunca las volví a ver	Pocas	Sí	Desaparecieron	Construcciones	Sí	Sí	Crecimiento urbano	No	No hay buenas condiciones para ellas	Sí	Por su valor estético	Sí	Valor emocional	NA	No	NA	NA	NA	No
P99	Más vieja	Hombre	Sí	Por su luz	Sí	Emoción	NA	Sí	Xangari, lago de la presa Cuitzeo	Temporada pasada (2021)	Solo pocas veces	Pocas	Sí	Hay menos ahora	Construcciones	Sí	Sí	Crecimiento urbano	No	No hay buenas condiciones para ellas	Sí	Por su función en las redes tróficas	Sí	Valor emocional	NA	Sí	Tenía muchos cuentos infantiles de luciérnagas	Mamá	Hace más de 20 años	Sí
P100	Más vieja	Mujer	Sí	Por su luz	Sí	Admiración	NA	Sí	Ventura Puente	Hace 50 años o más	Nunca las volví a ver	Muchas	Sí	Desaparecieron	Todas las anteriores	Sí	Sí	Crecimiento urbano	No	No hay buenas condiciones para ellas	Sí	Por su valor intrínseco	Sí	Valor ambiental	NA	No	NA	NA	NA	Sí
P101	Más vieja	Mujer	Sí	Por su luz	Sí	Emoción	NA	Sí	Avenida Universidad, Avenida Solidaridad	Hace aprox 20-49 años	Nunca las volví a ver	Pocas	Sí	Desaparecieron	Pavimentación	Sí	Sí	Crecimiento urbano	No	No hay buenas condiciones para ellas	Sí	Por sus funciones en el ecosistema	Sí	Valor emocional	NA	No	NA	NA	NA	No
P102	Más vieja	Mujer	Sí	Por su luz	Sí	Curiosa/curiosidad	NA	Sí	Obrera	Hace aprox 20-49 años	Nunca las volví a ver	Pocas	Sí	Desaparecieron	Construcciones	Sí	Sí	Crecimiento urbano	No	No hay buenas condiciones para ellas	Sí	Por sus funciones en el ecosistema	Sí	Valor emocional	NA	No	NA	NA	NA	No
P103	Más vieja	Hombre	Sí	Por su luz	Sí	Bonito/Bello/Hermoso/Lindo	NA	No	-	Nunca las he visto	NA	NA	NA	NA	NA	NA	Sí	Crecimiento urbano	Sí	Sí, hay buenas condiciones para ellas	Sí	Por sus funciones en el ecosistema	No	No son importantes	No me generaban interés (No me genera algún sentimiento)	No	NA	NA	NA	Sí
P104	Más vieja	Hombre	Sí	Por su luz	Sí	Bonito/Bello/Hermoso/Lindo	NA	No	-	Nunca las he visto	NA	NA	NA	NA	NA	NA	Sí	Crecimiento urbano	No	No hay buenas condiciones para ellas	Sí	Por sus funciones en el ecosistema	Sí	Valor estético	NA	No	NA	NA	NA	Sí
P105	Más vieja	Hombre	Sí	Por su luz	Sí	Divertida	NA	Sí	Valle Quieto	Temporada pasada (2021)	Frecuentemente	Muchas	Sí	Hay menos ahora	Construcciones	Sí	Sí	Crecimiento urbano	NA	NA	Sí	Por su función en las redes tróficas	Sí	Valor emocional	NA	No	NA	NA	NA	No
P106	Más vieja	Hombre	Sí	Por su luz	Sí	Bonito/Bello/Hermoso/Lindo	NA	Sí	Rincón Quieto	Temporada pasada (2021)	Frecuentemente	Pocas	Sí	Hay menos ahora	Construcciones	Sí	Sí	Crecimiento urbano	NA	NA	No sé	NA	Sí	Valor estético	NA	No	NA	NA	NA	Sí
P107	Más vieja	Mujer	Sí	Por su luz	Sí	Agradable/lo disfrutaba/me gustó	NA	No	-	Nunca las he visto	NA	NA	NA	NA	NA	NA	Sí	Contaminación	Sí	Sí, sería bueno	Sí	Por su valor estético	Sí	Valor estético	NA	No	NA	NA	NA	Sí
P108	Más vieja	Hombre	Sí	Por su luz	Sí	Bonito/Bello/Hermoso/Lindo	NA	Sí	El Planetario y Templo Santiaguito	Hace 50 años o más	Nunca las volví a ver	Pocas	Sí	Desaparecieron	Construcciones	Sí	Sí	Crecimiento urbano	No	No hay buenas condiciones para ellas	No sé	NA	No	No son importantes	No me generaban interés (Pasaban desapercibidas)	No	NA	NA	NA	Sí
P109	Más vieja	Mujer	Sí	Por su luz	Sí	Interesantes	NA	No	-	Nunca las he visto	NA	NA	NA	NA	NA	NA	Sí	Crecimiento urbano	No	No hay buenas condiciones para ellas	Sí	Por sus funciones en el ecosistema	No	No son importantes	No me generaban interés (No me parecen importantes)	No	NA	NA	NA	No
P110	Más vieja	Mujer	Sí	Por su luz	Sí	Bonito/Bello/Hermoso/Lindo	NA	Sí	Tenencia Morelos	Hace 50 años o más	Nunca las volví a ver	Muchas	Sí	Hay menos ahora	Construcciones	Sí	Sí	Crecimiento urbano	No	No hay buenas condiciones para ellas	Sí	Por sus funciones en el ecosistema	No	No son importantes	NA	Sí	Que no debíamos tocarlas (sacaban sarpullido)	Mamá	Hace más de 50 años	No
P111	Más vieja	Hombre	Sí	Por su luz	Sí	Fascinante	NA	No	-	Nunca las he visto	NA	NA	NA	NA	NA	NA	Sí	Crecimiento urbano	No	No hay buenas condiciones para ellas	Sí	Por sus funciones en el ecosistema	Sí	Valor estético	NA	No	NA	NA	NA	Sí
P112	Más vieja	Hombre	Sí	Por su luz	Sí	Bonito/Bello/Hermoso/Lindo	NA	Sí	Emiliano Zapata	Hace aprox 20-49 años	Nunca las volví a ver	Muchas	Sí	Desaparecieron	Construcciones	Sí	Sí	Crecimiento urbano	NA	NA	Sí	Por sus funciones en el ecosistema	No	No son importantes	No me gustaban	No	NA	NA	NA	No respondió la pregunta
